# Supplementary material for: A thematic study: impact of COVID-19 pandemic on rare disease organisations and patients across ten jurisdictions in the Asia Pacific region
Source: Springer Nature journal article supplement (doi:10.1186/s13023-021-01766-9), 2021-03-05
Supplement: MOESM1 [file 18935202]

**Additional File 1.** Top three areas of concern on the impact of COVID-19 on organisations from each jurisdiction group

|                                             | Most frequently identified                                                                        | 2 <sup>nd</sup> most frequently identified                                                                                                    | 3 <sup>rd</sup> most frequently identified                                                                                                      | Least frequently identified                                                           |
|---------------------------------------------|---------------------------------------------------------------------------------------------------|-----------------------------------------------------------------------------------------------------------------------------------------------|-------------------------------------------------------------------------------------------------------------------------------------------------|---------------------------------------------------------------------------------------|
| <b>Overall (n=177)*</b>                     | Patients' physical and psychological support (n=59; 33%)                                          | Daily operation of organisation (n=40; 23%)                                                                                                   | Preparedness for COVID-19 (n=22; 12%)<br>Decreased funding to organisation (n=22; 12%)                                                          | Economic impact on patients (n=8; 5%)                                                 |
| <b>HKSAR, China (n=41)*</b>                 | Patients' physical and psychological support (n=12; 29%)<br>Preparedness for COVID-19 (n=12; 29%) | Daily operation of organisation (n=7; 17%)                                                                                                    | Decreased funding to organisation (n=4; 10%)<br>Perception of COVID-19 (n=4; 10%)                                                               | Economic impact on patients (n=1; 2%)<br>Reduced awareness on rare diseases (n=1; 2%) |
| <b>Mainland China (n=55)*</b>               | Patients' physical and psychological support (n=23; 42%)                                          | Daily operation of organisation (n=14; 25%)                                                                                                   | Economic impact on patients (n=5; 9%)                                                                                                           | Perception of COVID-19 (n=2; 4%)                                                      |
| <b>Australia, New Zealand (n=43)*</b>       | Patients' physical and psychological support (n=13; 30%)                                          | Daily operation of organisation (n=11; 26%)                                                                                                   | Decreased funding to organisation (n=8; 19%)                                                                                                    | Preparedness for COVID-19 (n=0; 0%)                                                   |
| <b>Japan, Singapore, Taiwan (n=18)*</b>     | Decreased funding to organisation (n=5; 28%)                                                      | Patients' physical and psychological support (n=4; 22%)<br>Daily operation of organisation (n=4; 22%)<br>Preparedness for COVID-19 (n=4; 22%) | Reduced awareness on rare diseases (n=1; 6%)                                                                                                    | Economic impact on patients (n=0; 0%)<br>Perception of COVID-19 (n=0; 0%)             |
| <b>India, Malaysia, Philippines (n=14)*</b> | Daily operation of organisation (n=4; 29%)                                                        | Perception of COVID-19 (n=3; 21%)                                                                                                             | Patients' physical and psychological support (n=2; 14%)<br>Decreased funding to organisation (n=2; 14%)<br>Preparedness for COVID-19 (n=2; 14%) | Economic impact on patients (n=0; 0%)                                                 |

|                        |                      |                      |                            |
|------------------------|----------------------|----------------------|----------------------------|
| Impact on organisation | Patient's well-being | COVID-related aspect | Awareness on rare diseases |
|------------------------|----------------------|----------------------|----------------------------|

\* Participants could list up to 3 areas of concern

**COVID-19** coronavirus disease of 2019; **HKSAR** Hong Kong Special Administrative Region
